# Supplementary material for: Intrinsic excitability mechanisms of neuronal ensemble formation
Source: eLife. 2022 May 4;11:e77470. doi: 10.7554/eLife.77470 (PMC9197391; doi:10.7554/eLife.77470)
Supplement: Figure 1—source data 1. [file elife-77470-fig1-data1.xlsx]

## Sheet: Sheet1
Figure 1 - source data 1. Correlation coefficients of connected and no connected neurons
			1 = connected
			0 = no connected
	pairs	correlation	connection
	1	0.149792	1
	2	0.255886	1
	3	-0.604852	0
	4	-0.541588	0
	5	0.328267	0
	6	0.488109	1
	7	-0.460284	0
	8	0.344472	0
	9	-0.053954	0
	10	0.263368	1
	11	0.610785	0
	12	0.610785	0
	13	-0.373794	0
	14	-0.249154	0
	15	0.494923	1
	16	0.180194	0
	17	-0.461588	0
	18	0.406238	1
	19	-0.0741872	0
	20	-0.0850931	0
	21	0.0966038	0
	22	0.315825	0
	23	0.254007	0
	24	0.084916	1
	25	-0.0447033	0
	26	0.301009	0
	27	-0.370049	0
	28	0.140564	0
	connected pairs (mean ± std) 0.31 ± 0.16; n = 7; unconnected neuronal pairs -0.04 ± 0.37; n = 21; p = 0.049 by Mann-Whitney test
	unconnected pairs, correlation > zero; 0.32 ± 0.18; n = 9
