# Supplementary material for: Intrinsic excitability mechanisms of neuronal ensemble formation
Source: eLife. 2022 May 4;11:e77470. doi: 10.7554/eLife.77470 (PMC9197391; doi:10.7554/eLife.77470)
Supplement: Figure 1—source data 2. [file elife-77470-fig1-data2.xlsx]

## Sheet: Sheet1
Figure 1 - source data 2. Correlation coefficients of pair of neurons before and after optogenetic or electrical stimulation
		correlation coefficients
		optogenetic stimulation				control
	Pair	before	after		Pair	before	after
	1	-0.298394	-0.251876		1	-0.491015	-0.407968
	2	0.174454	0.532272		2	0.389026	0.533757
	3	0.129344	-0.0458546		3	0.244929	0.244717
	4	0.088157	0.155314		4	0.0152645	0.0540603
					5	0.315825	0.106605
		eletrical stimulation			6	0.263368	0.310408
	Pair	before	after		7	0.334758	0.199957
	1	-0.00103957	0.0983885		8	-0.373794	-0.499904
	2	0.140564	0.236155		9	-0.373794	-0.499904
	3	-0.436849	0.112381		10	0.215283	0.148356
	4	0.0381615	0.338239		11	0.0178101	0.159522
	5	0.318897	0.501848
	6	0.0150225	0.0765845
	7	-0.0749486	0.340896
	8	0.0189066	0.188644
	9	-0.389281	0.051961
	correlation stimulated pairs
	connected and unconnected pairs before: 0.02 ± 0.06; after stimulation: 0.2 ± 0.05; n = 13 pairs; p = 0.049 by Wilcoxon
		n = 2 connected, n = 11 unconnected
	correlations unstimulated pairs
	connected and unconnected pairs before: 0.05 ± 0.1; 30 minutes after: 0.03 ± 0.1, n = 11 pairs, p = 0.7 Wilcoxon
		n = 3 connected, n = 9 unconnected
