# Supplementary material for: Intrinsic excitability mechanisms of neuronal ensemble formation
Source: eLife. 2022 May 4;11:e77470. doi: 10.7554/eLife.77470 (PMC9197391; doi:10.7554/eLife.77470)
Supplement: Figure 2—source data 1. [file elife-77470-fig2-data1.xlsx]

## Sheet: Sheet1
Figure 2 - source data 1. Evoked unitary EPSC before and after optogenetic stimulation and unstimulated neurons
		photostimulation					control
		before	after	20' of rest			before	after
	EPSC	whole-cell				EPSC	whole-cell
	1	10.1285	6.074	NaN		1	17.3255	16.2576
	2	3.9422	3.4446	NaN		2	12.8083	10.3192
	3	55.5509	43.8409	NaN		3	7.5571	5.9682
	4	40.011	50.3757	NaN		4	14.5895	12.3178
	5	13.8658	4.2221	NaN
							perforated patch-clamp
		perforated patch-clamp				1	11.8147	9.27734
	1	11.3126	8.5713	13.8064		2	11.3126	11.7165
	2	12.5081	10.7788	24.6717		3	23.6945	23.2197
						4	20.2846	20.4481
						5	20.6083	21.5858
						6	12.1679	11.9084
						7	7.98355	8.31761
	(mean ± std)
	average EPSC1 peak currents of optogenetically stimulated neurons before: 13 ± 7 pA; after: 9 ± 7 pA; recovery: 19 ± 3 pA; p = 0.2 Wilcoxon; n = 7
	whole-cell n = 5; perforated patch-clamp n = 2
	average EPSC1 peak currents unstimulated neurons before: 13 ± 2 pA; after 30 min: 12 ± 2 pA; p = 0.1 Wilcoxon; n = 11.
	whole-cell n = 4; perforated patch-clamp n = 7
		photostimulation					control
		before	after	20' of rest			before	after
	PPR	whole-cell				PPR	whole-cell
	1	0.9504	0.7511	NaN		1	0.7738	0.8729
	2	1.0512	0.9239	NaN		2	0.9078	0.7046
	3	0.7292	0.7629	NaN		3	0.5694	0.7444
	4	0.6475	0.5256	NaN		4	0.87838	0.73445
	5	0.6221	0.6012	NaN
							perforated patch-clamp
		perforated patch-clamp				1	1.25031	1.36842
	1	1.22065	1.39838	1.33422		2	0.853679	0.563017
	2	1.1115	0.950911	1.11744		3	1.44032	1.24959
						4	1.5641	1.92565
						5	1.53842	1.27756
						6	1.46877	1.43776
						7	1.59828	1.28462
	PPR before stimulation: 0.95 ± 0.09; PPR after: 0.7 ± 0.1; p = 0.4 by Wilcoxon; n = 7
	whole-cell n = 5; perforated patch-clamp n = 2
	PPR unstimulted neurons before: 1.08 ± 0.12; after 30 min: 1. 06 ± 0.12; p = 0.7 Wilcoxon; n = 11
	whole-cell n = 4; perforated patch-clamp recordings n = 7
