# Supplementary material for: Intrinsic excitability mechanisms of neuronal ensemble formation
Source: eLife. 2022 May 4;11:e77470. doi: 10.7554/eLife.77470 (PMC9197391; doi:10.7554/eLife.77470)
Supplement: Figure 2—source data 2. [file elife-77470-fig2-data2.xlsx]

## Sheet: Sheet1
Figure 2 - source data 2. Evoked unitary EPSC before and after electrical stimulation and unstimulated neurons
		electrical stimulation					control
		before	after	20' of rest			before	after
	EPSC	perforated patch-clamp				EPSC	perforated patch-clamp
	1	13.7058	8.39845	19.918		1	14.5895	12.3178
	2	9.78148	8.16904	17.3702		2	11.8147	9.27734
	3	20.1595	8.32422	22.901		3	11.3126	11.7165
	4	20.3078	9.56053	24.3366		4	23.6945	23.2197
	5	20.4736	12.5786	22.5402		5	20.2846	20.4481
	6	13.9506	10.1297	16.768		6	20.6083	21.5858
	7	13.9072	3.97615	13.9762		7	12.1679	11.9084
						8	7.98355	8.31761
	(mean ± std)
	average EPSC1 peak currents of electrically stimulated neurons before: 14 ± 2 pA; after: 8 ± 1 pA; recovery: 20 ± 1 pA; p = 0.016 and p = 0.015 by Wilcoxon; n = 7
	average EPSC1 peak currents unstimulated neurons before: 13 ± 2 pA; after 30 min: 12 ± 2 pA; p = 0.6 Wilcoxon; n = 8.
		electrical stimulation					control
		before	after	20' of rest			before
	PPR	perforated patch-clamp				PPR	perforated patch-clamp
	1	1.30066	1.67198	1.72382		1	1.25031	1.36842
	2	0.934597	1.03259	1.05145		2	0.853679	0.563017
	3	1.71432	1.54183	1.7593		3	1.44032	1.24959
	4	0.432934	1.55657	0.774577		4	1.5641	1.92565
	5	1.43776	0.875051	1.31814		5	1.53842	1.27756
	6	1.30719	0.779655	1.52211		6	1.46877	1.43776
	7	1.2	0.333326	1.3		7	1.59828	1.28462
	PPR before stimulation: 0.95 ± 0.09; PPR after: 0.7 ± 0.1; rest post-stimulation: 1.3 ± 0.13; p = 0.4 and p = 0.1 Wilcoxon; n = 7
	PPR unstimulted neurons before: 1.4 ± 0.1; after 30 min: 1.3 ± 0.15; p = 0.5 Wilcoxon; n = 7
