# Supplementary material for: Intrinsic excitability mechanisms of neuronal ensemble formation
Source: eLife. 2022 May 4;11:e77470. doi: 10.7554/eLife.77470 (PMC9197391; doi:10.7554/eLife.77470)
Supplement: Figure 2—source data 3. [file elife-77470-fig2-data3.xlsx]

## Sheet: Sheet1
Figure 2 - source data 3. Evoked unitary EPSP before and after optogenetic and electrical stimulation
		optogenetic stimulation					control
		before	after	20' of rest			before	after
	EPSP	perforated patch-clamp				EPSP	perforated patch-clamp
	1	0.359682	0.272522	0.438971		1	0.463867	0.391642
	2	0.430118	0.37065	0.848389		2	0.375644	0.36315
						3	0.359682	0.372522
		electrical stimulation				4	1.10603	1.08386
	1	0.814819	0.286865	0.805664		5	0.359682	0.363023
	2	0.442505	0.286865	0.579834		6	1.57969	1.63831
	3	1.51367	0.564575	1.93481		7	1.58895	1.76635
	4	1.49841	0.531006	1.55945		8	0.955682	0.935304
	5	0.286102	0.18692	0.812531		9	0.253834	0.264456
	6	0.213623	0.198364	0.25177		10	0.430118	0.461251
	7	0.255585	0.232697	0.343323
	(mean ± std)
	average EPSP peak of optogenetic and electrical stimulated neurons before: 0.43 ± 0.2 mV; after: 0.28 ± 0.2 mV; 20 minutes recovery: 0.8 ± 0.2 mV
	p = 0.004 and p = 0.008 Wilcoxon; n = 9
	optogenetic stimulated n = 2; electrical stimulated n = 7
	average EPSP peak unstimulated neurons before: 0.44 ± 0.2 mV; after 30 min: 0.42 ± 0.2 mV; p = 0.7 by Wilcoxon; n = 10
