# Supplementary material for: Intrinsic excitability mechanisms of neuronal ensemble formation
Source: eLife. 2022 May 4;11:e77470. doi: 10.7554/eLife.77470 (PMC9197391; doi:10.7554/eLife.77470)
Supplement: Figure 3—source data 1. [file elife-77470-fig3-data1.xlsx]

## Sheet: Sheet1
Figure 3 - source data 1. Evoked local circuit EPSP and EPSC before and after optogenetic stimulation
		optogenetic stimulation					control
	composed EPSP	before	after	20' of rest		composed EPSC	before	after	20' of rest
	1	2.28239	1.30776	3.58175		1	-37.2311	-17.6453	-40.6752
	2	1.63831	0.536796	1.70789		2	-19.9419	-10.0183	-43.288
	3	1.57969	1.121	1.79786		3	-20.0686	-10.8075	-23.8815
	4	1.76681	1.34408	2.89815		4	-21.9419	-11.0183	-40.4061
	5	1.92912	1.58546	2.47131		5	-25.0686	-17.9083	-29.8317
	6	1.92099	0.452502	2.40267		6	-13.9422	-10.7788	-24.4446
	7	2.16607	1.32366	2.93755		7	-30.011	-16.2576	-40.3757
	amplitude of light-evoked EPSPs before: 2 ± 0.1 mV; after: 1.3 ± 0.2 mV; 20' rest: 2.5 ± 0.3 mV; p = 0.015 by Wilcoxon; n = 7
	amplitude of light-evoked EPSCs before: 22 ± 3 pA; after: 11 ± 1 pA; 20' rest: 40 ± 3 pA; p = 0.015 by Wilcoxon; n = 7
