# Supplementary material for: Intrinsic excitability mechanisms of neuronal ensemble formation
Source: eLife. 2022 May 4;11:e77470. doi: 10.7554/eLife.77470 (PMC9197391; doi:10.7554/eLife.77470)
Supplement: Figure 4—source data 1. [file elife-77470-fig4-data1.xlsx]

## Sheet: Sheet1
Figure 4 - source data 1. Spontaneous EPSPs before and after optogenetic stimulation
		optogenetic stimulation				photostimulation				optogenetic stimulation				photostimulation
		neurons expressing opsin				neurons non-expressing opsin				neurons expressing opsin				neurons non-expressing opsin
		number of sEPSCs per minute				number of EPSC per minute				median sEPSCs amplitude				median sEPSC amplitude
	cell	before	after		cell	before	after		cell	before	after		cell	before	after
	1	45	48		1	121	106		1	0.363538	0.43325		1	0.39317	0.393852
	2	124	174		2	258	180		2	0.399049	0.400459		2	0.396365	0.370418
	3	104	116		3	93	67		3	0.435647	0.429024		3	0.378748	0.378931
	4	64	111		4	67	55		4	0.379244	0.359199		4	0.369128	0.360069
	5	126	151		5	57	47		5	0.461038	0.528508		5	0.378882	0.380595
	6	112	276		6	120	132		6	0.398079	0.419571		6	0.396614	0.391608
	7	103	133		7	93	67		7	0.432992	0.443387		7	0.378748	0.378931
	8	75	125						8	0.341811	0.395576
	9	90	90						9	0.357098	0.383272
	10	55	129						10	0.360069	0.371753
	optogenetic stimulation
	neurons expressing opsin
	frequency of spontaneous EPSPs (number EPSP per minute) before: 90 ± 9 EPSPs/min; after: 127 ± 19; p = 0.004 by Wilcoxon; n = 10
	amplitude of spontaneous EPSPs before: 0.38 ± 0.01; after: 0.41 ± 0.02 mV; p = 0.04 by Wilcoxon
	photostimulation
	neurons non-expressing opsin
	frequency of spontaneous EPSPs (number EPSP per minute) before: 93 ± 25 EPSPs/min; after: 64 ± 18; 0.06 by Wilcoxon; n = 7
	amplitude of spontaneous EPSPs before: 0.37 ± 0.004 ; after: 0.37 ± 0.004 mV; p = 0.5 by Wilcoxon
