# Supplementary material for: Intrinsic excitability mechanisms of neuronal ensemble formation
Source: eLife. 2022 May 4;11:e77470. doi: 10.7554/eLife.77470 (PMC9197391; doi:10.7554/eLife.77470)
Supplement: Figure 4—source data 2. [file elife-77470-fig4-data2.xlsx]

## Sheet: Sheet1
Figure 4 - source data 2. Spontaneous EPSPs before and after electrical stimulation
		electrical stimulation				control				electrical stimulation				control
		number of sEPSPs per minute				number of sEPSP per minute				median sEPSPs amplitude				median sEPSP amplitude
	cell	before	after		cell	before	after		cell	before	after		cell	before	after
	1	51	205		1	120	132		1	0.392946	0.43162		1	0.396614	0.391608
	2	102	190		2	78	83		2	0.776582	0.76414		2	0.374448	0.376669
	3	112	235		3	146	141		3	0.427684	0.442183		3	0.388215	0.376055
	4	60	115		4	73	93		4	0.365498	0.397517		4	0.361183	0.365574
	5	54	86		5	98	79		5	0.360903	0.399835		5	0.350087	0.353483
	6	63	98		6	62	32		6	0.344674	0.37306		6	0.370562	0.376373
	7	78	109		7	121	106		7	0.374448	0.367601		7	0.39317	0.393852
	8	141	234		8	40	49		8	0.376055	0.408391		8	0.370389	0.377616
	9	163	133		9	54	47		9	0.373592	0.401922		9	0.360903	0.394063
	10	190	226		10	108	110		10	0.466228	0.482575		10	0.395943	0.393198
	11	78	79		11	218	219		11	0.356858	0.403645		11	0.410427	0.413
	12	79	84		12	63	60		12	0.323501	0.32911		12	0.344674	0.358226
	13	87	118						13	0.368747	0.377229
	electrical stimulation
	neurons non-expressing opsin
	frequency of spontaneous EPSPs (number EPSP per minute) before: 80 ± 12 EPSPs/min; after: 118 ± 17; p = 0.001 by Wilcoxon; n = 13
	amplitude of spontaneous EPSPs before:0.37 ± 0.0; after: 0.40 ± 0.03 mV; p = 0.03 by Wilcoxon
	control
	neurons non-expressing opsin
	frequency of spontaneous EPSPs (number EPSP per minute) before: 98 ± 18 EPSPs/min; after: 93 ± 15; p = 0.4 by Wilcoxon; n = 12
	amplitude of spontaneous EPSPs before: 0.37 ± 0.01 ; after: 0.38 ± 0.01 mV; p = 0.4 by Wilcoxon
