# Supplementary material for: Intrinsic excitability mechanisms of neuronal ensemble formation
Source: eLife. 2022 May 4;11:e77470. doi: 10.7554/eLife.77470 (PMC9197391; doi:10.7554/eLife.77470)
Supplement: Figure 5—source data 1. [file elife-77470-fig5-data1.xlsx]

## Sheet: Sheet1
Figure 5 - source data 1. Neuronal excitability increases after optogenetic or electrical stimulation
	(median ± std)
		optogenetic stimulation					opsin expressing ustimulated neurons					optogenetic stimulation, terfer effect							electrical stim non-espressing neurons					electrical stim control - unstimulatde non-expresing neurons
		number of spikes					number of spikes					number of spikes							number of spikes					number of spikes
		before		after			before		after			before		after		terfer			before		after			before		after
	pA	mean	std	mean	std		mean	std	mean	std		mean	std	mean	std	mean	std		mean	std	mean	std		mean	std	mean	std
	20	0	0	0	0		0	0	0	0		0	0	0	0	0	0		0	0	0	0		0	0	0	0
	40	0	0	1.25	0.350865		0.285714	0.267261	0.285714	0.267261		0	0	0.8	0.387298	0	0		0	0	0.6	0.244949		0.0714286	0.0714286	0.0714286	0.0714286
	60	1.91667	0.542976	4	0.443813		3.28571	0.698638	3.42857	0.786796		1	0.5	3	0.5	0.6	0.316228		0.8	0.247088	2.55	0.223312		1.35714	0.32492	1	0.2965
	80	4.41667	0.583333	5.91667	0.556754		5	0.912871	5	0.912871		3.2	0.580948	4.6	0.53619	3.4	0.193649		2.5	0.303488	4.05	0.276015		2.92857	0.245045	3.07143	0.266526
	100	6.33333	0.677935	7.41667	0.67933		7	0.677003	6.71429	0.755929		4.8	0.680074	6.2	0.632456	5.2	0.460977		4.05	0.256238	5	0.280976		4.42857	0.271631	4.21429	0.280865
	120	7.91667	0.847977	8.58333	0.743235		8	0.707107	7.85714	0.852168		6.4	0.774597	6.8	0.680074	6.4	0.53619		5.05	0.336194	6.05	0.336194		5.28571	0.285714	5.28571	0.321886
	140	9	0.904534	9.91667	0.874368		9.14286	0.748013	9	0.677003		7.4	0.774597	8.2	0.844097	7.2	0.632456		6.1	0.354668	7.2	0.420526		6.14286	0.360969	6.14286	0.390226
	160	9.91667	0.933049	10.6667	0.890466		9.85714	0.626783	9.85714	0.748013		8	0.901388	9	0.901388	8.2	0.632456		7.05	0.343932	8.25	0.440544		NaN	0.40032	NaN	0.442686
	5 ± 1 to 6 ± 1 spikes; p = 0.015 by Wilcoxon; n = 12						5 ± 1 to 5 ± 1 spikes; p = 1 by Wilcoxon; n = 7					4 ± 1 spikes		5 ± 1 spikes		4 ± 0.3 Hz			4 ± 1 to 5 ± 1 spikes; p = 0.015 by Wilcoxon; n = 22					4 ± 1 to 4 ± 1 spikes; p = 1 by Wilcoxon; n = 10
												p = 0.015 by Wilcoxon; n = 7
		optogenetic stimulation					opsin expressing ustimulated neurons					optogenetic stimulation, terfer effect							electrical stim non-espressing neurons					electrical stim control - unstimulatde non-expresing neurons
		Average frequency (Hz)					Average frequency (Hz)					Average frequency (Hz)							Average frequency (Hz)					Average frequency (Hz)
		before		after			before		after			before		after		terfer			before		after			before		after
	pA	mean	std	mean	std		mean	std	mean	std		mean	std	mean	std	mean	std		mean	std	mean	std		mean	std	mean	std
	20	0	0	0	0		0	0	0	0		0	0	0	0	0	0		0	0	0	0		0	0	0	0
	40	0	0	2.63094	0.820297		0.607644	0.568399	0.60868	0.569368		0	0	1.65697	0.806824	0	0		0	0	0.984427	0.481075		0	0	0	0
	60	4.54013	1.30074	8.70554	0.970517		7.40126	1.40707	9.17517	1.25468		2.4207	1.24451	6.98429	1.71129	1.08108	0.85467		1.47612	0.546227	4.89828	0.566911		2.22965	0.757493	1.44481	0.657695
	80	9.6672	1.41982	12.8697	1.2704		12.9141	0.949245	13.2713	1.36687		8.99248	1.83699	11.963	1.99937	8.82036	1.48928		5.20512	0.647072	8.00466	0.526477		6.20014	0.666199	6.12437	0.664451
	100	13.8698	1.54096	15.8595	1.42872		16.6627	1.20726	16.8348	1.40224		12.4145	2.14284	13.8505	1.64345	12.1119	1.57464		8.40399	0.589549	10.2125	0.621983		8.98687	0.601632	8.83266	0.610851
	120	16.7961	1.76926	18.432	1.64494		19.4702	1.38341	19.1523	1.56497		14.433	2.06826	16.2332	2.08171	13.9473	1.48519		10.8439	0.700733	12.7063	0.7007		11.0888	0.6432	11.0188	0.65017
	140	19.3977	2.03816	21.3333	1.88146		21.3556	1.3636	21.4494	1.7466		17.4454	2.53908	18.5274	2.26405	16.33	2.02048		13.0852	0.780347	14.9626	0.873187		13.2887	0.710796	13.1306	0.778203
	160	21.7259	2.05799	23.4815	1.97649		23.7453	1.5162	23.1859	1.85973		18.9123	2.53851	20.6022	2.22087	18.1965	2.01495		15.1553	0.855052	17.2068	1.02255		NaN	0.757796	NaN	0.898504
	15 ± 3 to 17 ± 3 Hz; p = 0.015 by Wilcoxon						16 ± 3 to 16 ± 3 Hz; p = 0.5 by Wilcoxon					11 ± 2 Hz		12 ± 2 Hz		10 ± 1 Hz			8 ± 2 to 10 ± 2 Hz; p = 0.015 by Wilcoxon					9 ± 2 to 9 ± 2 Hz; p = 1 by Wilcoxon
												p = 0.015 by Wilcoxon
		optogenetic stimulation					opsin expressing ustimulated neurons					optogenetic stimulation, terfer effect							electrical stim non-espressing neurons					electrical stim control - unstimulatde non-expresing neurons
		First frequency (Hz)					First frequency (Hz)					First frequency (Hz)							First frequency (Hz)					First frequency (Hz)
		before		after			before		after			before		after		terfer			before		after			before		after
	pA	mean	std	mean	std		mean	std	mean	std		mean	std	mean	std	mean	std		mean	std	mean	std		mean	std	mean	std
	20	0	0	0	0		0	0	0	0		0	0	0	0	0	0		0	0	0	0		0	0	0	0
	40	0	0	2.76214	0.874634		0.607644	0.568399	0.60868	0.569368		0	0	1.65697	0.806824	0	0		0	0	0.960232	0.46379		0	0	0	0
	60	5.70856	1.54452	10.7353	1.5856		9.40023	2.35339	8.60133	2.19169		3.57986	1.22363	9.21524	2.66155	1.08108	0.85467		1.47964	0.546353	4.92128	0.609305		2.21508	0.753722	1.48542	0.679711
	80	14.1485	2.78292	18.6577	2.6231		19.5845	2.83665	19.738	2.81056		13.175	3.26637	19.645	5.7093	11.7898	3.49646		5.22647	0.79266	8.62599	0.801902		6.96537	0.901288	6.7181	0.915771
	100	22.4714	3.47726	26.2083	3.74036		31.9767	5.41251	28.9513	4.02754		22.1679	6.10195	23.7355	5.32252	19.4052	5.62082		9.69917	1.30627	12.231	1.15584		11.4117	1.05468	10.6891	1.10069
	120	29.3338	4.28639	32.6287	4.73418		39.1816	5.79195	36.4503	5.35224		28.0755	7.30879	30.9284	7.41878	23.4794	5.80144		14.7223	1.99097	17.3368	1.50222		15.5195	1.28294	14.9455	1.43129
	140	36.1618	5.33414	38.4375	5.19054		47.1519	6.70792	43.4321	5.89995		40.4583	11.4232	38.8845	9.25044	30.5673	8.01517		20.3171	2.62532	22.5553	2.33815		20.6641	1.72272	19.4169	1.72114
	160	40.8731	5.84122	43.4324	5.85117		54.7794	7.36188	51.2358	7.20757		45.0247	12.6817	43.7988	10.3256	33.6179	7.97058		25.5616	2.81726	28.5688	3.15175		NaN	1.83174	NaN	2.37378
	24 ± 3 to 27 ± 3 Hz; p = 0.015 Wilcoxon						25 ± 6 to 24 ± 6 Hz; p = 0.2 by Wilcoxon					18 ± 5 Hz		22 ± 6 Hz		16 ± 5 Hz			14 ± 3 to 17 ± 3 Hz; p = 0.015 by Wilcoxon					15 ± 3 to15 ± 3 Hz; p = 1 by Wilcoxon
												p = 0.015 by Wilcoxon
