# Supplementary material for: Intrinsic excitability mechanisms of neuronal ensemble formation
Source: eLife. 2022 May 4;11:e77470. doi: 10.7554/eLife.77470 (PMC9197391; doi:10.7554/eLife.77470)
Supplement: Figure 6—source data 1. [file elife-77470-fig6-data1.xlsx]

## Sheet: Sheet1
Figure 6 - source data 1. Membrane voltage responses to current injections, before and after optogenetic or electrical stimulation
		optogenetic stim					opsin expressing ustimulated neurons					optogenetic stim, terfer effect							electrical stim non-espressing neurons					electrical stim control - unstimulatde non-expresing neurons
		voltage responces to current inyection (I/V curve)					voltage responces to current inyection (I/V curve)					voltage responces to current inyection (I/V curve)							voltage responces to current inyection (I/V curve)					voltage responces to current inyection (I/V curve)
		before		after			before		after			before		after		terfer			before		after			before		after
	pA	mean	std	mean	std		mean	std	mean	std		mean	std	mean	std	mean	std		mean	std	mean	std		mean	std	mean	std
	40	-62.1474	1.15433	-60.3282	1.64313		-56.392	2.5038	-57.4782	1.79368		-64.8744	0.228886	-63.9336	0.524791	-65.6504	0.194207		-64.6374	0.456649	-64.0737	0.421565		-63.1108	1.18129	-62.6203	1.04639
	20	-54.8726	1.72569	-52.5753	1.86717		-47.4102	2.82529	-50.4221	1.77438		-58.6722	0.805642	-58.1095	0.237772	-60.3727	0.602255		-58.7013	0.778086	-57.9494	0.822723		-55.9354	1.90591	-56.0527	1.05501
	0	-70	0	-70	0		-70	0	-70	0		-70	0	-70	0	-70	0		-70	0	-70	0		-70	0	-70	0
	-20	-76.5907	0.765666	-77.7645	1.0048		-80.2426	1.42497	-79.4786	1.21114		-74.3291	0.0763788	-73.9318	0.284751	-73.8012	0.116739		-74.4949	0.344406	-74.9236	0.381835		-76.9676	0.835906	-76.468	1.01636
	-40	-82.3711	1.27645	-83.8192	1.53388		-87.4258	1.94032	-86.5772	1.96233		-77.8456	0.223144	-77.9305	0.17958	-77.297	0.190275		-78.4485	0.514699	-79.1489	0.573761		-82.059	1.59117	-82.1339	1.65446
	-60	-87.1904	1.64712	-88.8642	1.95135		-93.1495	2.32222	-92.8207	2.38924		-81.4753	0.361329	-81.3735	0.386946	-80.6048	0.300829		-82.1064	0.675053	-82.8567	0.751116		-86.7764	2.04996	-86.7185	2.26577
	-80	-91.706	1.87367	-93.7563	2.21395		-98.0595	2.66591	-97.2661	2.63335		-84.153	0.43196	-84.647	0.210613	-83.6718	0.398107		-85.0056	0.740928	-86.2422	0.819603		-91.1439	2.53837	-90.8302	2.6888
	-100	-95.673	2.11032	-97.9206	2.42699		-102.047	2.9762	-101.637	3.0302		-86.9044	0.466664	-87.7185	0.257766	-86.2745	0.513301		-87.7654	0.873131	-89.4202	0.902365		-94.69	2.96782	-94.4752	3.01549
	-120	-99.1882	2.28443	-101.498	2.61054		-105.97	3.31524	-105.746	3.44619		-89.3492	0.563405	-90.1729	0.284021	-88.821	0.551259		-90.203	0.872498	-92.1988	1.00857		-97.7055	3.28733	-97.7766	3.4617
	-140	-102.523	2.46734	-104.282	2.84799		-109.588	3.6611	-108.891	3.88255		-91.4193	0.616742	-92.7651	0.220869	-90.811	0.615509		-92.4226	0.94791	-94.6185	1.06813		-100.515	3.55884	-100.851	3.91835
