# Supplementary material for: Intrinsic excitability mechanisms of neuronal ensemble formation
Source: eLife. 2022 May 4;11:e77470. doi: 10.7554/eLife.77470 (PMC9197391; doi:10.7554/eLife.77470)
Supplement: Figure 6—source data 2. [file elife-77470-fig6-data2.xlsx]

## Sheet: Sheet1
Figure 6 - source data 2. Input resistance before and after optogenetic or electrical stimulation
		optogenetic stim				opsin expressing ustimulated neurons				optogenetic stim, terfer effect					electrical stim non-espressing neurons				electrical stim control - unstimulatde non-expresing neurons
		resistance				resistance				resistance					resistance				resistance
	Cell	before	after		Cell	before	after		Cell	before	after	terfer		Cell	before	after		Cell	before	after
	1	286	304		1	296	296		1	189	193	185		1	195	185		1	196	195
	2	282	310		2	286	296		2	184	171	162		2	227	250		2	177	195
	3	289	365		3	336	338		3	153	172	150		3	179	193		3	220	216
	4	268	283		4	324	301		4	166	157	158		4	244	296		4	154	163
	5	263	316		5	349	329		5	286	286	279		5	251	274		5	159	154
	6	273	336		6	345	362		6	187	187	183		6	176	197		6	213	214
	7	316	390		7	311	316		7	126	129	130		7	190	181		7	151	149
	8	286	296		8	144	146		8	136	161	138		8	135	163		8	217	219
	9	187	191						9	146	161	137		9	154	218		9	172	171
	10	317	327											10	175	179		10	157	165
	11	126	129											11	255	277		11	179	190
	12	136	161
	13	291	306
	14	146	161
	(median ± std)
	optogenetic stimulation
	resistence before: 278 ± 18; after optogenetic stimulation: 305 ± 22 mΩ; p = 0.0001 by Wilcoxon; n = 14
	opsin expressing ustimulated neurons
	resistence before: 318 ± 23; 30 minutes after 309 ± 24 mΩ; p = 0.9 by Wilcoxon; n = 8
	optogenetic stimulation, terfer effect
	resistence before: 158 ± 15; after terfer: 153 ± 16 mΩ; p = 0.9 by Wilcoxon; n = 9
	electrical stim non-espressing neurons
	resistence before: 176 ± 9; after electrical stimulation: 185 ± 9 mΩ; p = 0.0003 by Wilcoxon; n = 11
	electrical stim control - unstimulatde non-expresing neurons
	resistence before: 171 ± 11; 30 minutes after: 174 ± 8 mΩ; p = 0.3 by Wilcoxon; n = 11
