# Supplementary material for: Intrinsic excitability mechanisms of neuronal ensemble formation
Source: eLife. 2022 May 4;11:e77470. doi: 10.7554/eLife.77470 (PMC9197391; doi:10.7554/eLife.77470)
Supplement: Figure 6—source data 3. [file elife-77470-fig6-data3.xlsx]

## Sheet: Sheet1
Figure 6 - source data 3. Resting membrane potential before and after optogenetic or electrical stimulation
		optogenetic stimulation				opsin expressing ustimulated neurons				optogenetic stimulation, terfer effect				electrical stim non-espressing neurons
		membrane potential				membrane potential				membrane potential				membrane potential
	Cell	before	after		Cell	before	after		Cell	before	terfer		Cell	before	after
	1	-74.2371	-72.2898		1	-73.074	-78.7437		1	-71.4257	-73.4761		1	-82.926	-82.1472
	2	-71.251	-71.8721		2	-84.5732	-79.7082		2	-74.1684	-72.1119		2	-77.6733	-71.1134
	3	-72.4786	-71.3234		3	-73.1789	-80.399		3	-74.7789	-77.1652		3	-79.7082	-79.0738
	4	-68.0248	-67.2354		4	-81.7721	-80.4111		4	-81.2165	-80.9938		4	-77.3775	-79.0297
	5	-67.5403	-67.5552		5	-70.3089	-69.4665		5	-77.8138	-76.9501		5	-75.7358	-75.7131
	6	-71.3039	-70.2913		6	-63.0792	-64.1924		6	-81.3196	-84.359		6	-69.0451	-69.4591
	7	-78.8172	-76.0153		7	-79.8757	-76.4281		7	-83.376	-84.3746		7	-73.1789	-78.0348
	8	-71.4029	-73.4816		8	-69.9119	-69.6909		8	-79.3	-75.4896		8	-80.4111	-78.1814
	9	-71.0426	-72.4179		9	-76.2589	-77.8906						9	-85.4148	-83.1802
	10	-83.3477	-81.5642		10	-75.7358	-73.24						10	-79.5132	-82.0624
					11	-80.9002	-81.5936						11	-76.6161	-83.5805
					12	-70.6149	-74.8119						12	-83.4853	-79.3
					13	-69.0451	-68.9558						13	-83.6863	-83.8962
	(median ± std)
	optogenetic stimulation
	membrane potential before:-73 ± 2; after optogenetic stimulation: -72 ± 1 mV; p = 0.4 by Wilcoxon; n = 10
	opsin expressing ustimulated neurons
	membrane potential before: 73 ± 2 to 30 minutes after -75 ± 2 mV; p = 0.8 by Wilcoxon; n = 13
	optogenetic stimulation, terfer effect
	membrane potential before: -78 ± 2; after terfer: -77 ± 2 mV; p = 0.8 by Wilcoxon; n = 8
	electrical stim non-espressing neurons
	membrane potential: -80 ± 1; after electrical stimulation: -79 ± 1 mV; p = 0.9 by Wilcoxon; n = 13
