# Supplementary material for: Intrinsic excitability mechanisms of neuronal ensemble formation
Source: eLife. 2022 May 4;11:e77470. doi: 10.7554/eLife.77470 (PMC9197391; doi:10.7554/eLife.77470)
Supplement: Figure 7—source data 1. [file elife-77470-fig7-data1.xlsx]

## Sheet: Sheet1
Figure 7 - source data 1. Firing threshold before and after optogenetic or electrical stimulation
															electrical stim				electrical stim control
		optogenetic stim				opsin expressing ustimulated neurons				optogenetic stimn, terfer effect					non-espressing neurons				unstimulatde non-expresing neurons
		threshold				threshold				threshold					threshold				threshold
	Cell	before	after		Cell	before	after		Cell	before	after	terfer		Cell	before	after		Cell	before	after
	1	-41.5649	-45.0745		1	-41.3818	-41.8396		1	-41.5649	-45.0745	-42.6025		1	-38.4521	-43.335		1	-38.8794	-38.4521
	2	-41.5649	-44.1284		2	-44.4031	-46.7224		2	-45.8679	-47.3938	-45.8374		2	-38.9099	-39.8254		2	-44.7693	-44.7998
	3	-37.8113	-39.0015		3	-37.384	-37.8723		3	-37.1399	-38.1165	-36.3464		3	-46.6003	-46.5088		3	-44.62	-45.5933
	4	-41.2292	-43.335		4	-34.1797	-32.1045		4	-41.0767	-43.1519	-40.9241		4	-34.4543	-37.5977		4	-42.2363	-42.572
	5	-39.2456	-38.9802		5	-41.7786	-41.1377		5	-41.1072	-43.6707	-43.8232		5	-35.5225	-36.9873		5	-41.1377	-41.2292
	6	-35.8489	-35.0647		6	-53.6804	-54.8706		6	-41.6565	-47.1497	-46.6614		6	-38.208	-43.457		6	-44.8843	-45.1965
	7	-43.2434	-45.7153		7	-44.7083	-44.1284		7	-43.335	-45.1355	-44.5557		7	-39.2761	-42.2363		7	-45.6848	-45.2271
	8	-35.6445	-38.9709		8	-41.687	-42.3279		8	-43.2434	-47.1191	-44.5557		8	-38.2996	-39.6729		8	-42.2668	-42.9993
	9	-45.2271	-46.8445											9	-42.4805	-44.4031		9	-44.8914	-45.7153
	10	-37.1399	-38.1165											10	-41.8396	-42.2363		10	-44.3726	-44.6777
	11	-41.0767	-43.1519											11	-44.6777	-46.051		11	-39.7644	-38.2996
	12	-46.7224	-51.3											12	-41.748	-43.335
	13	-41.9006	-43.6707											13	-41.0156	-42.2058
														14	-45.7153	-49.3164
														15	-50.5981	-53.1921
	(median ± std)													16	-42.7856	-44.0979
	optogenetic stimulation													17	-41.0461	-44.1895
	firing threshold before: -41± 1; after optogenetic stimulation: -43.7 ± 1 mV; p = 0.0012 by Wilcoxon; n = 13													18	-41.6565	-47.1497
	opsin expressing ustimulated neurons													19	-42.2668	-44.4641
	firing threshold before: -41 ± 2; 30 minutes after -41 ± 2 mV; p = 0.7 by Wilcoxon; n = 8													20	-43.335	-45.1355
	optogenetic stimulation, terfer effect													21	-44.3726	-47.2107
	firing threshold after stimulation: -45 ± 1; after terfer: -44 ± 1 mV; p = 0.05 by Wilcoxon; n = 8													22	-46.8445	-52.6123
	electrical stim non-espressing neurons
	firing threshold before: -42 ± 0.8; after electrical stimulation: -44 ± 0.8 mV; p = 0.00004 by Wilcoxon; n = 22
	electrical stim control - unstimulated non-expresing neurons
	firing threshold before: -42 ± 0.7; 30 minutes after: -43 ± 0.8 mV; p = 0.5 by Wilcoxon; n = 11
